# Supplementary figures and images for: Transcriptome features of striated muscle aging and predictability of protein level changes
Source: Royal Society of Chemistry journal article supplement (doi:10.1039/d1mo00178g), 2021-07-22

RNA-protein correlation (this study) between transcripts with lower vs. higher predictability

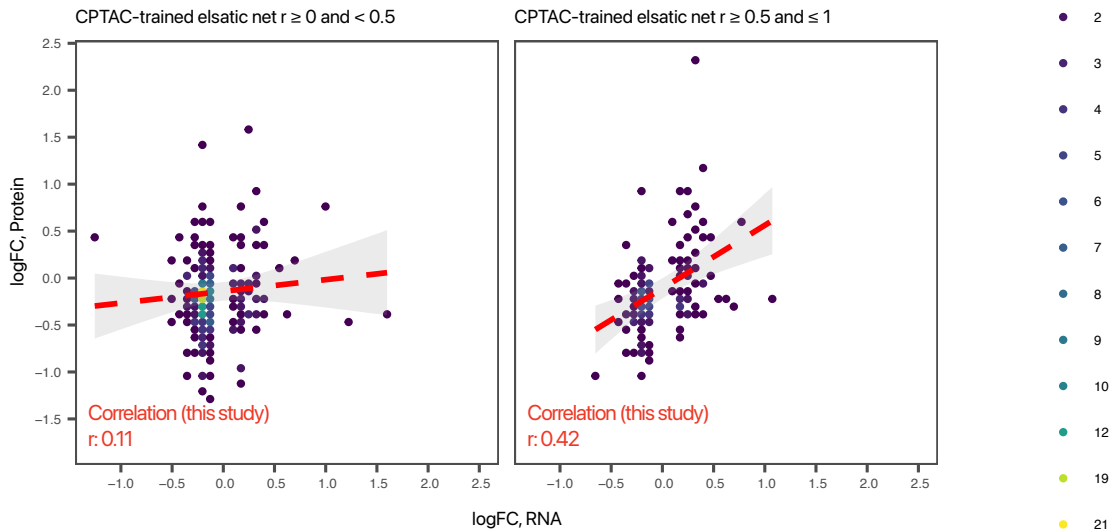

Supplement: d1mo00178g5.pdf [file d1mo00178g5.pdf]
